# Supplementary material
Source: PubMed Central journal article supplement (PMC3522204)

(A)

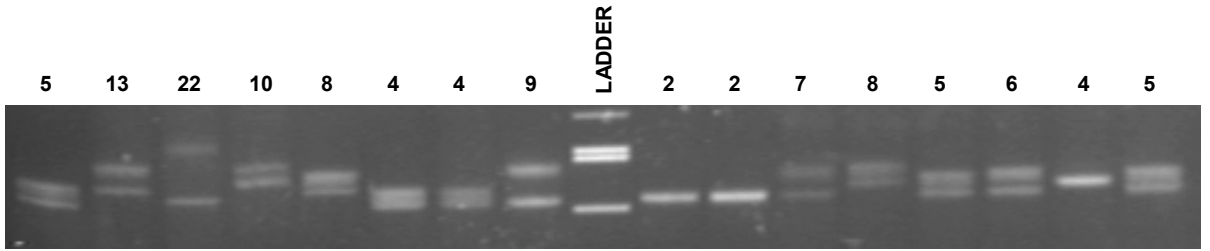

(B)

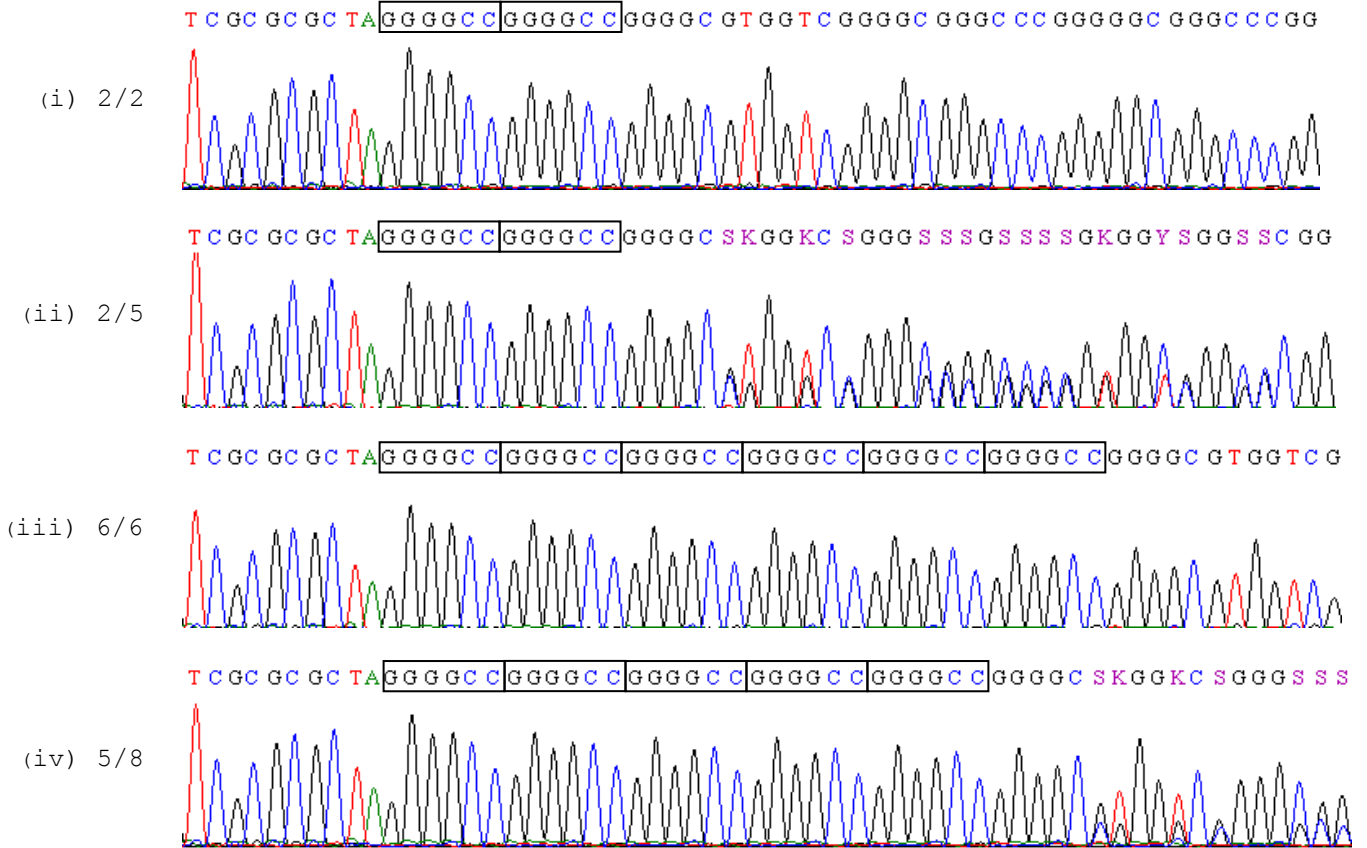

Supplement: ejhg201298x2.pdf [file ejhg201298x2.pdf]
